# Supplementary material for: Surveillance of Antimicrobial Prescriptions in Community Pharmacies Located in Tokyo, Japan
Source: MDPI journal article supplement (doi:10.3390/antibiotics12081325), 2023-08-17
Supplement: s1 [file s1]

Table S1. The classifications and formulations of the antimicrobial agents for 42 insurance pharmacies.

| Antimicrobial class                                              | Antimicrobial agents and formulations                                                                                                                                                                                                                                                                                                                                                    |
|------------------------------------------------------------------|------------------------------------------------------------------------------------------------------------------------------------------------------------------------------------------------------------------------------------------------------------------------------------------------------------------------------------------------------------------------------------------|
| Penicillin with extended spectrum                                | ampicillin (capsules), amoxicillin (capsules, fine granules, and tablets), and bacampicillin (tablets)                                                                                                                                                                                                                                                                                   |
| Combinations of penicillins, incl. beta-lactamase inhibitors     | amoxicillin/clavulanic acid (tablets and dry syrup) and sultamicillin (tablets)                                                                                                                                                                                                                                                                                                          |
| 1 <sup>st</sup> cephalosporins                                   | cefalexin (tablets, dry syrup, capsules, fine granules, and granules)                                                                                                                                                                                                                                                                                                                    |
| 2 <sup>nd</sup> cephalosporins                                   | cefuroxime (tablets) and cefaclor (capsules, fine granules, and granules)                                                                                                                                                                                                                                                                                                                |
| 3 <sup>rd</sup> cephalosporins                                   | cefixime (capsules and fine granules), cefpodoxime (tablets and dry syrup), cefdinir (tablets, capsules, and fine granules), cefditoren (tablets and fine granules), cefcapene (tablets and fine granules), and cefteteram (tablets)                                                                                                                                                     |
| Carbapenems                                                      | tebipenem pivoxil (fine granules)                                                                                                                                                                                                                                                                                                                                                        |
| Other cephalosporins and penems                                  | faropenem (tablets and dry syrup)                                                                                                                                                                                                                                                                                                                                                        |
| Fluoroquinolones                                                 | ofloxacin (tablets), ciprofloxacin (tablets), norfloxacin (tablets), lomefloxacin (tablets), levofloxacin (tablets and fine granules), moxifloxacin (tablets), prulifloxacin (tablets), garenoxacin (tablets), sitafloxacin (tablets), tosufloxacin (tablets and fine granules), and lascufloxacin (tablets)                                                                             |
| Macrolides                                                       | erythromycin (tablets, dry syrup, and granules), roxithromycin (tablets), josamycin (syrup), clarithromycin (tablets, dry syrup), and azithromycin (tablets, capsules, and fine granules)                                                                                                                                                                                                |
| Aminoglycosides                                                  | kanamycin (capsules)                                                                                                                                                                                                                                                                                                                                                                     |
| Lincosamides                                                     | clindamycin (capsules) and lincomycin (capsules)                                                                                                                                                                                                                                                                                                                                         |
| Tetracyclines                                                    | demeclocycline (capsules), doxycycline (tablets), tetracycline (capsules), and minocycline (capsules, tablets, and granules)                                                                                                                                                                                                                                                             |
| Fosfomycin                                                       | fosfomycin (tablets and dry syrup)                                                                                                                                                                                                                                                                                                                                                       |
| Anti-tuberculous drug                                            | cycloserine (capsules), rifampicin (capsules), isoniazid (tablets, powder), pyrazinamide (powder), and ethambutol (tablets)                                                                                                                                                                                                                                                              |
| Combinations of sulfonamides and trimethoprim, incl. derivatives | sulfamethoxazole and trimethoprim (tablets and granules)                                                                                                                                                                                                                                                                                                                                 |
| Combinations for the eradication of <i>Helicobacter pylori</i>   | lansoprazole/amoxicillin (capsules)/clarithromycin (tablets), rabeprazole/amoxicillin (capsules)/clarithromycin (tablet), vonoprazan/amoxicillin (capsules)/clarithromycin (tablets), lansoprazole/amoxicillin (capsules) and metronidazole (tablets), rabeprazole/amoxicillin (capsules) and metronidazole (tablets), and vonoprazan/amoxicillin (capsules) and metronidazole (tablets) |

|                      |                                                                   |
|----------------------|-------------------------------------------------------------------|
| Other antimicrobials | linezolid (tablets), vancomycin (powder), and rifaximin (tablets) |
|----------------------|-------------------------------------------------------------------|

Table S2. The classifications and formulations of the antimicrobial agents for 12 pharmacies located in front of pediatric clinics.

| Antimicrobial class                                              | Antimicrobial agents and formulations                                                                                                  |
|------------------------------------------------------------------|----------------------------------------------------------------------------------------------------------------------------------------|
| Penicillins with extended spectrum                               | amoxicillin (fine granules)                                                                                                            |
| Combinations of penicillins, incl. beta-lactamase inhibitors     | amoxicillin and clavulanic acid (dry syrup)                                                                                            |
| 1 <sup>st</sup> cephalosporins                                   | cefalexin (dry syrup and fine granules)                                                                                                |
| 3 <sup>rd</sup> cephalosporins                                   | cefixime (fine granules), cefpodoxime (dry syrup), cefdinir (fine granules), cefditoren (fine granules), and cefcapene (fine granules) |
| Carbapenems                                                      | tebipenem pivoxil (fine granules)                                                                                                      |
| Other cephalosporins and penems                                  | faropenem (dry syrup)                                                                                                                  |
| Fluoroquinolones                                                 | tosufloxacin (fine granules)                                                                                                           |
| Macrolides                                                       | erythromycin (dry syrup), josamycin (syrup), clarithromycin (tablets, dry syrup), and azithromycin (fine granules)                     |
| Tetracyclines                                                    | minocycline (granules)                                                                                                                 |
| Fosfomycin                                                       | fosfomycin (dry syrup)                                                                                                                 |
| Anti-tuberculous drug                                            | cycloserine (capsules), rifampicin (capsules), isoniazid (tablets, powder), pyrazinamide (powder), and ethambutol (tablets)            |
| Combinations of sulfonamides and trimethoprim, incl. derivatives | sulfamethoxazole and trimethoprim (granules)                                                                                           |

Table S3. Proportions of oral antimicrobial agents prescribed between April 2013 and 2019 in 12 community pharmacies located in front of pediatric clinics

| Antimicrobial class | % of prescriptions each year |      |      |      |      |              |
|---------------------|------------------------------|------|------|------|------|--------------|
|                     | 2013<br>From<br>April        | 2014 | 2015 | 2016 | 2017 | 2018<br>2019 |

|                                                                  |      |      |      |      |      |      |      |
|------------------------------------------------------------------|------|------|------|------|------|------|------|
| Penicillins with an extended spectrum                            | 12.8 | 18.8 | 22.3 | 16.0 | 19.8 | 36.2 | 21.9 |
| Combinations of penicillins, incl. beta-lactamase inhibitors     | 3.3  | 4.9  | 12.1 | 19.7 | 15.6 | 9.4  | 20.4 |
| 1 <sup>st</sup> cephalosporins                                   | 0.0  | 0.6  | 0.6  | 2.1  | 5.4  | 8.0  | 7.7  |
| 3 <sup>rd</sup> cephalosporins                                   | 43.6 | 46.9 | 38.6 | 34.7 | 32.3 | 27.8 | 32.8 |
| Carbapenems                                                      | 1.7  | 0.4  | 2.0  | 2.7  | 0.8  | 0.4  | 0.0  |
| Other cephalosporins and penems                                  | 0.5  | 0.0  | 2.3  | 2.0  | 0.1  | 0.1  | 0.0  |
| Fluoroquinolones                                                 | 10.2 | 3.8  | 3.7  | 5.2  | 8.7  | 3.7  | 3.1  |
| Macrolides                                                       | 26.0 | 22.8 | 17.0 | 16.2 | 14.4 | 11.8 | 12.8 |
| Tetracyclines                                                    | 1.4  | 1.3  | 0.7  | 1.0  | 3.0  | 1.1  | 0.0  |
| Fosfomycin                                                       | 0.4  | 0.4  | 0.7  | 1.0  | 3.0  | 1.1  | 0.0  |
| Anti-tuberculous drug                                            | 0.1  | 0.0  | 0.0  | 0.0  | 0.0  | 0.0  | 0.0  |
| Combinations of sulfonamides and trimethoprim, incl. derivatives | 0.0  | 0.0  | 0.0  | 0.1  | 0.0  | 1.5  | 1.3  |
