# Supplementary figures and images for: Surveillance of Antimicrobial Prescriptions in Community Pharmacies Located in Tokyo, Japan
Source: MDPI journal article supplement (doi:10.3390/antibiotics12081325), 2023-08-17

Year (No. of prescriptions)

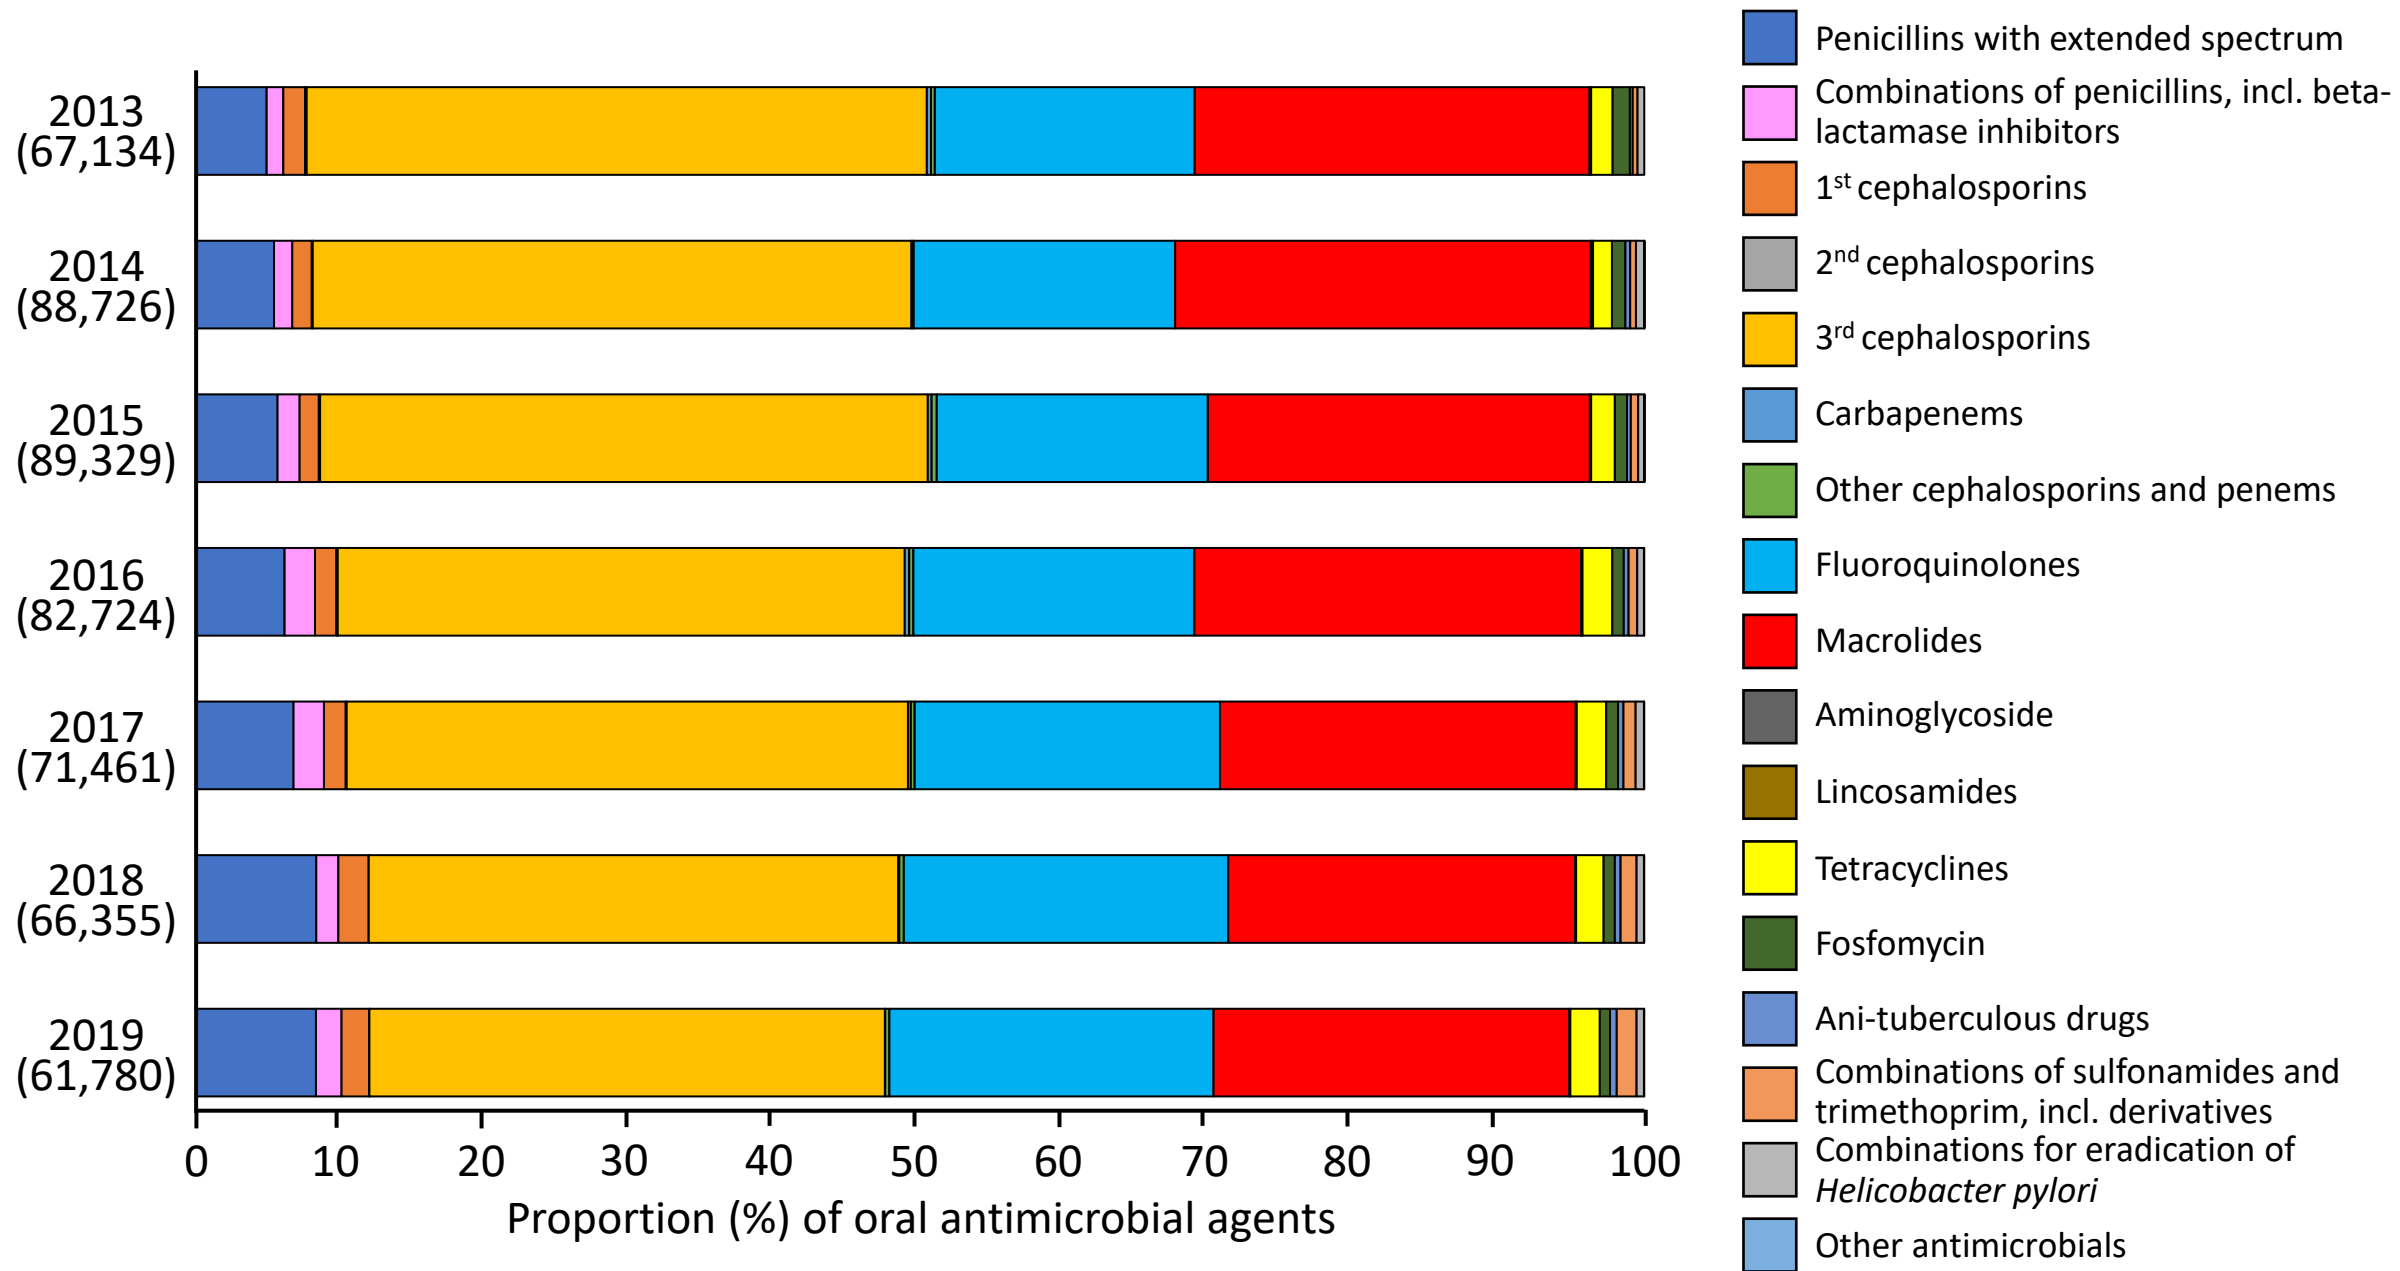

Supplement: s1 [file s1]

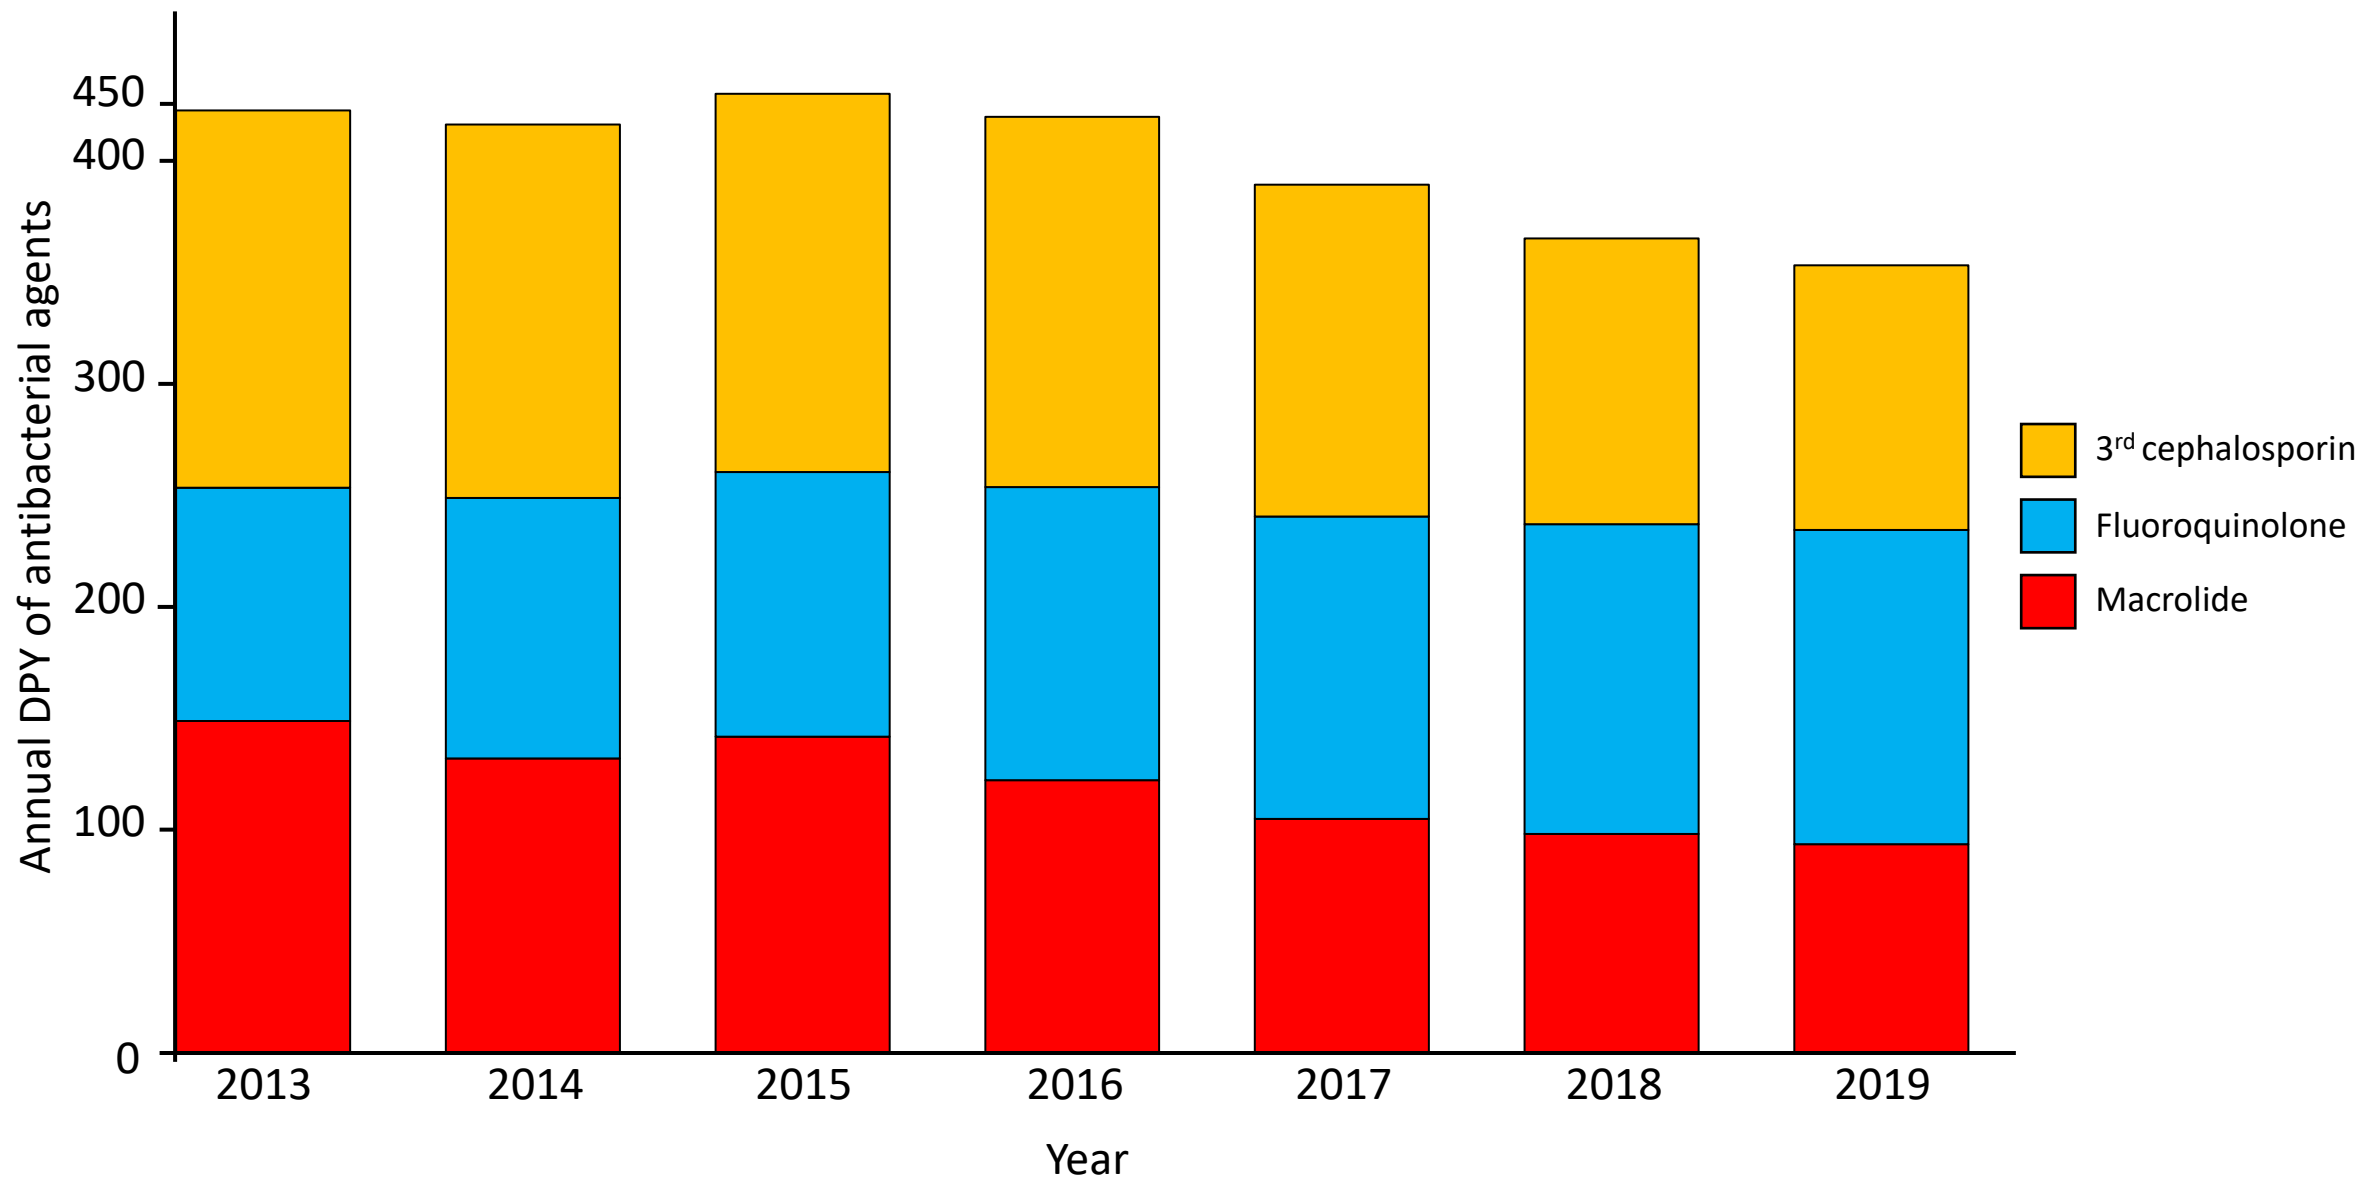

Supplement: s1 [file s1]

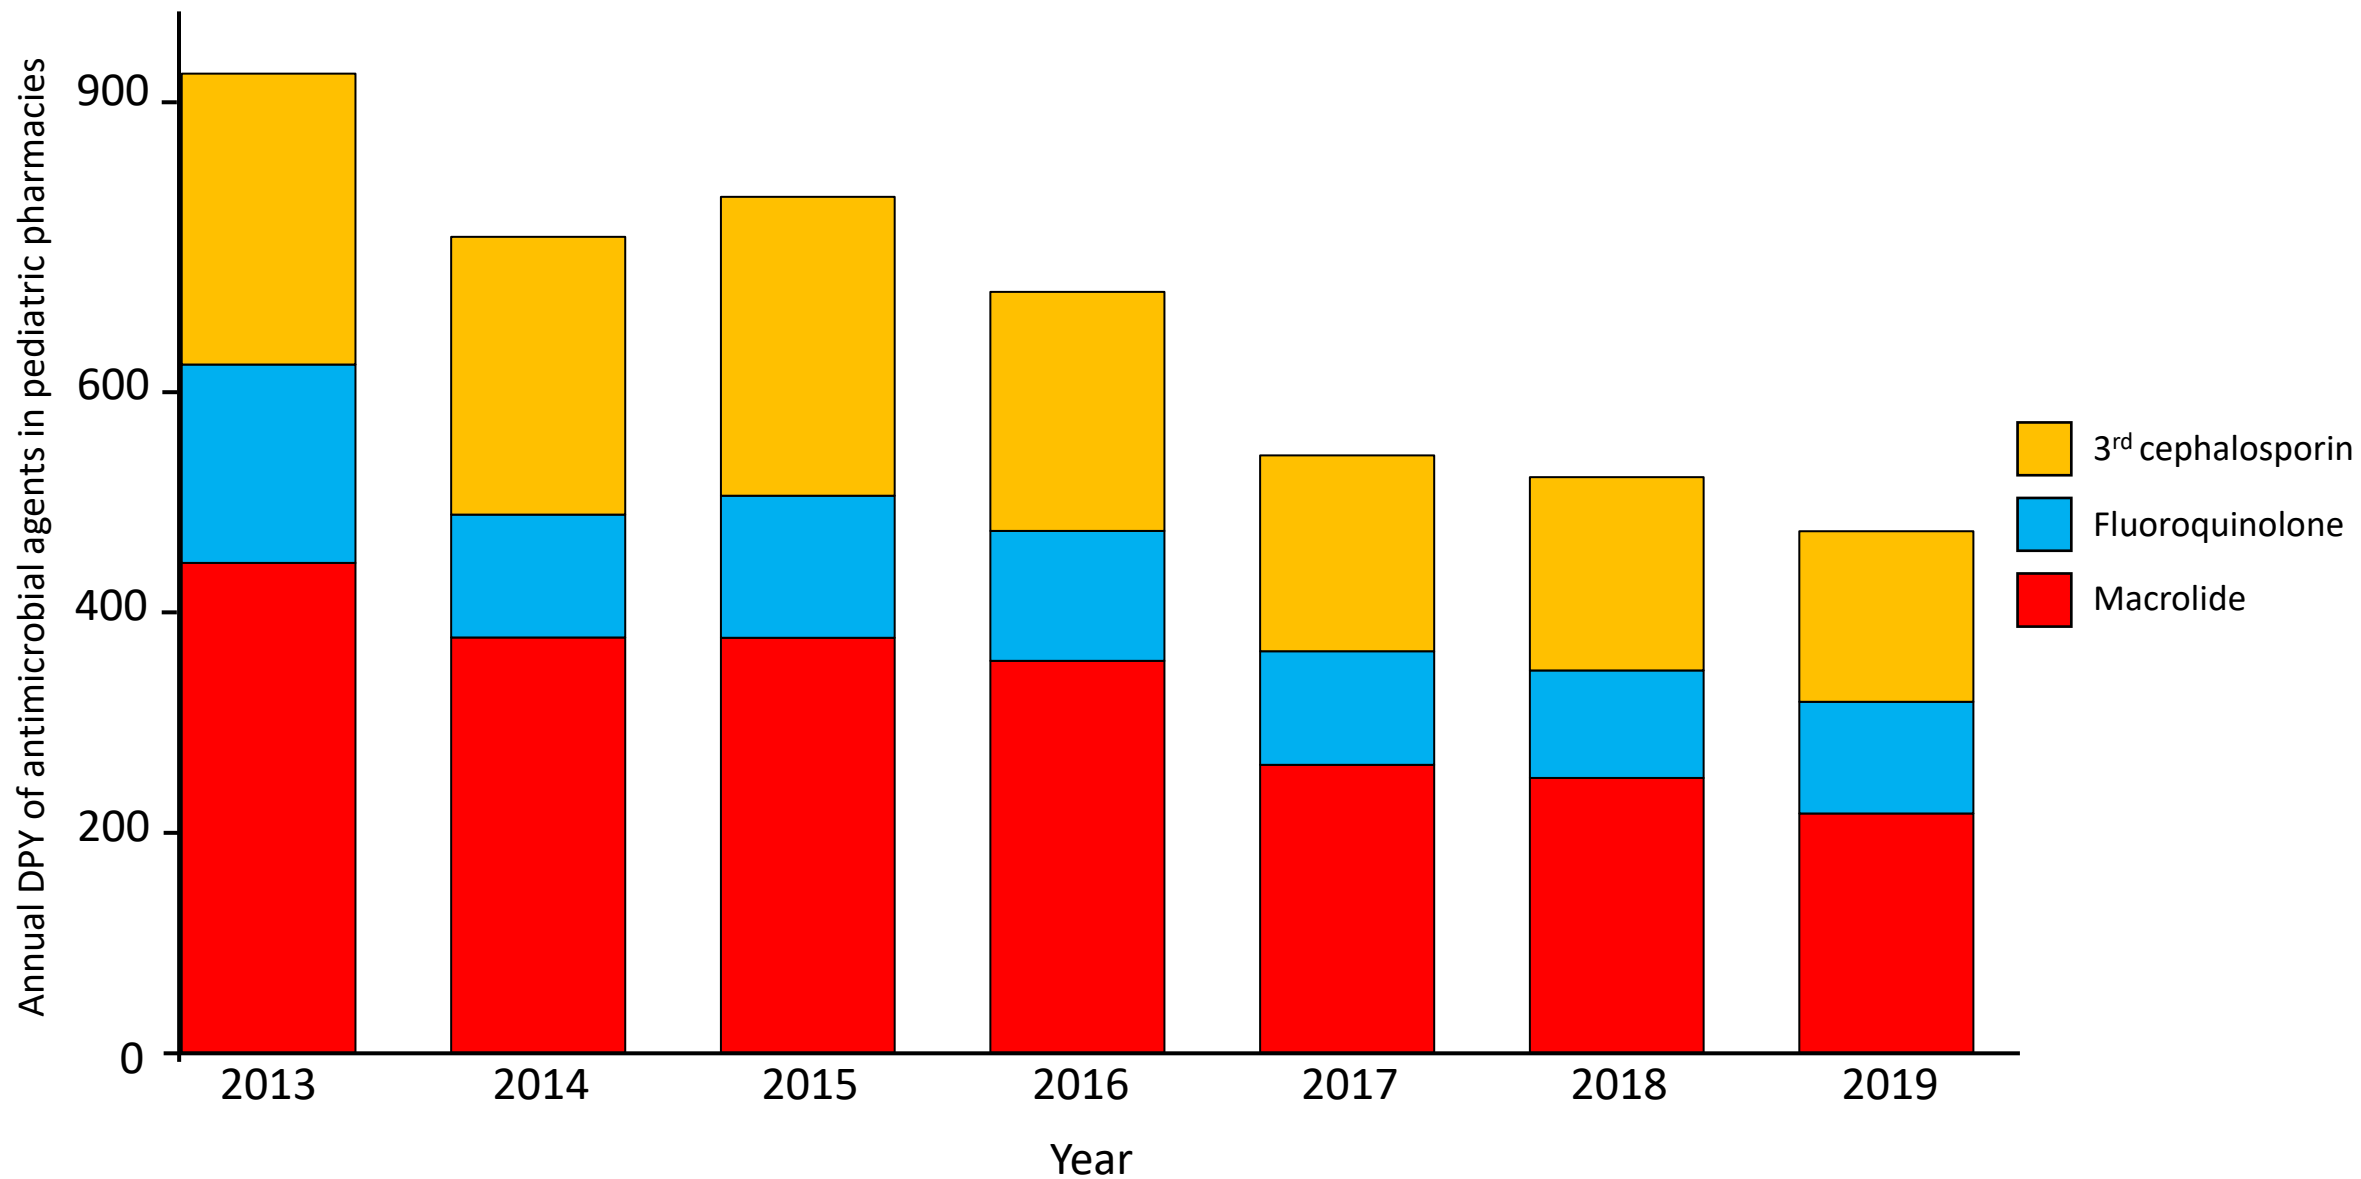

Supplement: s1 [file s1]
